# Supplementary material for: An integrated care model improved the quality of life of patients with chronic respiratory diseases living in rural areas with limited access to care: data from a prospective interventional cohort study
Source: Research Square preprint supplement (doi:10.21203/rs.3.rs-7828298/v1), 2026-02-18
Supplement: Supplementary file 1 [file 5591e43cdc08260275b8512e.docx]

**SUPPLEMENTARY MATERIAL**

**An integrated care model improved the quality of life of patients with chronic respiratory diseases living in rural areas with limited access to care: data from a prospective interventional cohort study**

Marie Joyeux-Faure1,2#, Raoua Ben Messaoud1#, Robin Terrail2, Sébastien Bailly1,2, Jean-Claude Cornu3, Khier Amrani3, Jean-Charles Dron4, Pierrick Haan5, Yann Le Guillou6, Marie Pirotais6, Soumaya Balbolia6, Jean-Louis Pépin1,2*, on behalf of e-Meuse project investigators

1Univ. Grenoble Alpes, INSERM, CHU Grenoble Alpes, HP2 Laboratory, Grenoble, France.

2Pole Thorax et Vaisseaux, Laboratoire EFCR (Explorations Fonctionnelles Cardiovasculaire et Respiratoire), CHU Grenoble Alpes, Grenoble, France

3Pneumology Department, Verdun Hospital, Verdun, France

4Consortium e-Meuse santé, France

5SEFAM, Villers-lès-Nancy, France

6BIOSENCY, Cesson Sévigné, France

#Co-first authors

**E-Meuse Investigators (in alphabetical order by last name)**

| **Name** | **Affiliation** |
| --- | --- |
| Rémi Aiguebone | Univ. Grenoble Alpes, INSERM, CHU Grenoble Alpes, HP2 Laboratory, Grenoble, France; Pole Thorax et Vaisseaux, Laboratoire EFCR (Explorations Fonctionnelles Cardiovasculaire et Respiratoire), CHU Grenoble Alpes, Grenoble, France |
| Khier Amrani | Service de Pneumologie, Centre Hospitalier de Verdun, Verdun, France |
| Sébastien Bailly | Univ. Grenoble Alpes, INSERM, CHU Grenoble Alpes, HP2 Laboratory, Grenoble, France; Pole Thorax et Vaisseaux, Laboratoire EFCR (Explorations Fonctionnelles Cardiovasculaire et Respiratoire), CHU Grenoble Alpes, Grenoble, France |
| Soumaya Balbolia | BIOSENCY, Cesson Sévigné, France |
| Raoua Ben Messaoud | Univ. Grenoble Alpes, INSERM, CHU Grenoble Alpes, HP2 Laboratory, Grenoble, France |
| Jean-Claude Cornu | Service de Pneumologie, Centre Hospitalier de Verdun, Verdun, France |
| Jean-Charles Dron | Consortium E-Meuse santé |
| Valérie Estève | DOR, Etain, France |
| Hugo Haan | SEFAM, Villers-lès-Nancy, France |
| Pierrick Haan | SEFAM, Villers-lès-Nancy, France |
| Marie Joyeux-Faure | Univ. Grenoble Alpes, INSERM, CHU Grenoble Alpes, HP2 Laboratory, Grenoble, France; Pole Thorax et Vaisseaux, Laboratoire EFCR (Explorations Fonctionnelles Cardiovasculaire et Respiratoire), CHU Grenoble Alpes, Grenoble, France |
| Sabine Laurent | DOR, Etain, France |
| Yann Le Guillou | BIOSENCY, Cesson Sévigné, France |
| Sylvain Le Liepvre | BIOSENCY, Cesson Sévigné, France |
| Thi Hong Van Ngo | Univ. Grenoble Alpes, INSERM, CHU Grenoble Alpes, HP2 Laboratory, Grenoble, France |
| Murielle Parant | Service de Pneumologie, Centre Hospitalier de Verdun, Verdun, France |
| Jean-Louis Pépin | Univ. Grenoble Alpes, INSERM, CHU Grenoble Alpes, HP2 Laboratory, Grenoble, France; Pole Thorax et Vaisseaux, Laboratoire EFCR (Explorations Fonctionnelles Cardiovasculaire et Respiratoire), CHU Grenoble Alpes, Grenoble, France |
| Marie Pirotais | BIOSENCY, Cesson Sévigné, France |
| Renaud Tamisier | Univ. Grenoble Alpes, INSERM, CHU Grenoble Alpes, HP2 Laboratory, Grenoble, France ; Pole Thorax et Vaisseaux, Laboratoire EFCR (Explorations Fonctionnelles Cardiovasculaire et Respiratoire), CHU Grenoble Alpes, Grenoble, France |
| Robin Terrail | Pole Thorax et Vaisseaux, Laboratoire EFCR (Explorations Fonctionnelles Cardiovasculaire et Respiratoire), CHU Grenoble Alpes, Grenoble, France |

**TABLE S1** Primary outcome in the overall population (univariate analysis)

|  | **Baseline (n=400)** | **3 months (n=346)** | **6 months (n=326)** | **p-value** |
| --- | --- | --- | --- | --- |
| **SF-36 scores** |  |  |  |  |
| MCS | 47.7±0.6 | 49.9±0.6 | 50.9±0.6 | <0.001 |
| PCS | 40.4±0.5 | 42.5±0.5 | 43.4±0.5 | 0.422 |
| **Scores for SF-36 domains** |  |  |  |  |
| Physical functioning | 56.0±1.4 | 57.1±1.5 | 59.2±1.5 | 0.022 |
| Role limitations due to physical health | 63.6±2.1 | 78.5±1.9 | 82.8±1.9 | <0.01 |
| Role limitations due to emotional problems | 71.2±2.1 | 80.3±2.0 | 82.9±2.0 | <0.001 |
| Vitality | 50.9±1.1 | 57.4±1.0 | 59.8±1.1 | <0.001 |
| Mental health | 64.6±1.1 | 67.7±1.1 | 69.7±1.1 | <0.001 |
| Social functioning | 73.4±1.3 | 77.6±1.2 | 79.4±1.2 | <0.001 |
| Body pain | 65.2±1.2 | 70.6±1.3 | 73.8±1.3 | <0.001 |
| General health | 48.9±1.0 | 51.0±1.2 | 51.6±1.2 | 0.002 |
| Health change | 46.9±1.1 | 59.0±1.4 | 59.8±1.4 | <0.001 |

Data are mean ± standard error of the mean.

MCS, mental component subscale; PCS, physical component subscale; SF-36, Short Form-36.

**TABLE S2** Primary outcome by disease subgroup (univariate analysis)

|  | **COPD** | | | | **OS** | | | | **OSA** | | | |
| --- | --- | --- | --- | --- | --- | --- | --- | --- | --- | --- | --- | --- |
| **Baseline (n=147)** | **3 months (n=120)** | **6 months (n=111)** | **p-value** | **Baseline (n=105)** | **3 months (n=98)** | **6 months (n=89)** | **p-value** | **Baseline (n=148)** | **3 months (n=128)** | **6 months (n=126)** | **p-value** |
| **SF-36 scores** |  |  |  |  |  |  |  |  |  |  |  |  |
| MCS | 50.0±1.1 | 50.5±1 | 51.0±1.1 | 0.184 | 46.8±1.2 | 50.7±1.0 | 50.0±1.1 | 0.909 | 46.0±0.9 | 48.8±1.0 | 51.3±0.9 | <0.001 |
| PCS | 39.1±0.9 | 41±0.9 | 41.5±1 | 0.128 | 38.4±1 | 39.6±1.0 | 40.9±1 | 0.391 | 43.1±0.8 | 46.4±0.8 | 46.9±0.8 | 0.054 |
| **Scores for SF-36 domains** |  |  |  |  |  |  |  |  |  |  |  |  |
| Physical functioning | 50.6±2.2 | 50.5±2.6 | 52.1±2.8 | 0.665 | 48.1±2.6 | 49.3±2.7 | 50.7±2.8 | 0.432 | 66.9±2.1 | 69.8±2.2 | 71.4±2.1 | 0.015 |
| Role limitations due to physical health | 62.5±3.7 | 77.7±3.4 | 79.6±3.3 | <0.01 | 61.9±4.1 | 76.3±3.6 | 79.8±3.9 | <0.01 | 65.9±3.4 | 80.9±3.0 | 87.6±2.6 | <0.01 |
| Role limitations due to emotional problems | 74.3±3.4 | 76.1±3.7 | 78.1±3.7 | 0.573 | 64.1±4.5 | 83.3±3.4 | 81.6±4 | 0.001 | 73.2±3.3 | 82.0±3.1 | 88.0±2.6 | <0.001 |
| Vitality | 53.7±1.8 | 57.6±1.8 | 58±1.9 | 0.085 | 50.4±1.9 | 55.5±1.9 | 56.4±2.1 | 0.011 | 48.3±1.8 | 58.6±1.7 | 63.9±1.6 | <0.001 |
| Mental health | 67.4±1.9 | 69.1±2.0 | 70.5±2.1 | 0.219 | 62.4±2.1 | 66.0±2.1 | 66.5±2.1 | 0.042 | 63.3±1.7 | 67.6±1.9 | 71.2±1.7 | <0.001 |
| Social functioning | 76.4±2.2 | 77.4±2.0 | 78.7±2.1 | 0.747 | 69.9±2.5 | 76.9±2.2 | 75±2.5 | 0.128 | 73.1±2.0 | 78.5±2.0 | 83.1±1.8 | <0.001 |
| Body pain | 68.6±2.2 | 72.3±2.2 | 73.7±2.3 | 0.03 | 62.4±2.1 | 67.2±2.3 | 71.1±2.6 | 0.002 | 63.8±1.9 | 71.7±2.3 | 75.8±1.9 | <0.001 |
| General health | 48.1±1.6 | 49.2±1.9 | 47.3±1.9 | 0.97 | 43.6±2.0 | 46.4±2.0 | 46.1±2.4 | 0.294 | 53.4±1.7 | 56.2±2.1 | 59.4±1.9 | <0.001 |
| Health change | 48.3±1.8 | 56.7±2.3 | 54.1±2.2 | 0.01 | 48.8±2.1 | 50.3±2.6 | 57.0±2.7 | 0.03 | 44.3±1.8 | 67.8±2.2 | 66.9±2.2 | <0.001 |

Data are mean ± standard error of the mean.

COPD, chronic obstructive pulmonary disease; MCS, mental component subscale; OS, overlap syndrome; OSA, obstructive sleep apnea; PCS, physical component subscale; SF-36, Short Form-36.

**TABLE S3** Evolution of Short Form-36 items over time in multivariate linear mixed models for the overall population

|  | **β-coefficient [95% CI]** | **p-value** |
| --- | --- | --- |
| **SF-36 scores** |  |  |
| MCS | 0.484 [0.296;0.673] | <0.001 |
| PCS | 0.410 [0.263;0.558] | <0.001 |
| **Scores for SF-36 domains** |  |  |
| Physical functioning | 0.365 [0.064; 0.666] | 0.018 |
| Role limitations due to physical health | 2.886 [2.102; 3.676] | <0.001 |
| Role limitations due to emotional problems | 1.767 [0.998; 2.537] | <0.001 |
| Vitality | 1.363 [1.028; 1.701] | <0.001 |
| Mental health | 0.767 [0.458; 1.076] | <0.001 |
| Social functioning | 0.867 [0.435; 1.302] | <0.001 |
| Body pain | 1.433 [1.009; 1.859] | <0.001 |
| General health | 0.446 [0.17; 0.723] | 0.002 |
| Health change | 2.143 [1.603; 2.685] | <0.001 |

Data are mean ± standard error of the mean.

CI, confidence interval; MCS, mental component subscale; PCS, physical component subscale; SF-36, Short Form-36.

**TABLE S4** Evolution of Short Form-36 items over time in multivariate linear mixed models by disease subgroup

|  | **COPD** | | **OS** | | **OSA** | |
| --- | --- | --- | --- | --- | --- | --- |
|  | **β-coefficient [95% CI]** | **p-value** | **β-coefficient [95% CI]** | **p-value** | **β-coefficient [95% CI]** | **p-value** |
| **SF-36 scores** |  |  |  |  |  |  |
| MCS | 0.071 [–0.236;0.379] | 0.651 | 0.469 [0.126;0.817] | 0.008 | 0.856 [0.537;1.175] | <0.001 |
| PCS | 0.305 [0.066;0.548] | 0.013 | 0.293 [–0.004;0.595] | 0.056 | 0.577 [0.341;0.812] | <0.001 |
| **Scores for SF-36 domains** |  |  |  |  |  |  |
| Physical functioning | 0.132 [–0.371;0.635] | 0.608 | 0.232 [–0.302;0.771] | 0.397 | 0.658 [0.14;1.177] | 0.013 |
| Role limitations due to physical health | 2.586 [1.25;3.942] | <0.001 | 2.637 [1.079;4.232] | 0.001 | 3.337 [2.107;4.567] | <0.001 |
| Role limitations due to emotional problems | 0.447 [–0.812;1.706] | 0.487 | 2.671 [1.142;4.231] | 0.001 | 2.377 [1.134;3.626] | <0.001 |
| Vitality | 0.507 [–0.055;1.075] | 0.079 | 0.736 [0.19;1.292] | 0.009 | 2.522 [1.947;3.099] | <0.001 |
| Mental health | 0.351 [–0.158;0.861] | 0.177 | 0.611 [0.053;1.173] | 0.033 | 1.25 [0.722;1.781] | <0.001 |
| Social functioning | 0.157 [–0.553;0.876] | 0.666 | 0.667 [–0.141;1.49] | 0.109 | 1.618 [0.896;2.338] | <0.001 |
| Body pain | 0.626 [–0.135;1.396] | 0.109 | 1.396 [0.541;2.264] | 0.002 | 1.900 [1.190;2.612] | <0.001 |
| General health | –0.14 [–0.641;0.363] | 0.585 | 0.302 [–0.251;0.855] | 0.286 | 0.881 [0.359;1.405] | 0.001 |
| Health change | 0.932 [0.067;1.787] | 0.034 | 1.172 [0.119;2.252] | 0.032 | 3.656 [2.722;4.595] | <0.001 |

Data are mean ± standard error of the mean.

CI, confidence interval; COPD, chronic obstructive pulmonary disease; MCS, mental component subscale; OS, overlap syndrome; OSA, obstructive sleep apnea; PCS, physical component subscale; SF-36, Short Form-36.

**TABLE S5** Factors affecting the change in Short Form-36 score over time for the overall population

| **Variables** | **Items** | **MCS** | | | **PCS** | | |
| --- | --- | --- | --- | --- | --- | --- | --- |
| **β coefficient [95% CI]** | **p-value** | **Overall p-value** | **β coefficient [95% CI]** | **p-value** | **Overall p-value** |
| Time effect (months) |  | 0.484 [0.296;0.673] | <0.001 |  | 0.410 [0.263;0.558] | <0.001 |  |
| Group | OSA vs. COPD | –0.929 [–3.326;1.469] | 0.451 | 0.327 | 4.714 [2.534;6.894] | <0.001 | <0.001 |
| OS vs. COPD | –1.912 [–4.406;0.582] | 0.136 |  | –0.432 [–2.702;1.837] | 0.711 |  |
| Age |  | 0.158 [0.054;0.262] | 0.003 |  | –0.04 [–0.134;0.055] | 0.413 |  |
| Sex | Male vs. female | 3.243 [1.303;5.181] | 0.001 |  | 2.475 [0.71;4.238] | 0.007 |  |
| Cardiovascular diseases | Yes vs. no | 0.027 [–2.076;2.129] | 0.980 |  | –1.327 [–3.241;0.587] | 0.178 |  |
| Diabetes | Yes vs. no | –1.408 [–4.296;1.48] | 0.343 |  | –2.018 [–4.652;0.615] | 0.136 |  |

CI, confidence interval; COPD, chronic obstructive pulmonary disease; MCS, mental component subscale; OS, overlap syndrome; OSA, obstructive sleep apnea; PCS, physical component subscale.

**TABLE S6** Factors affecting the change in Short Form-36 physical component subscale scores over time for the whole population

| **Variables** | **Items** | **β coefficient [95% CI]** | **p-value** | **Overall p-value** |
| --- | --- | --- | --- | --- |
| **Physical functioning** |  |  |  |  |
| Time effect (months) |  | 0.365 [0.064;0.666] | 0.018 | <0.001 |
| Group | OSA vs. COPD | 16.678 [10.804;22.553] | <0.001 |
| OS vs. COPD | –1.472 [–7.606;4.664] | 0.641 |
| Age |  | –0.157 [–0.412;0.097] | 0.229 |
| Sex | Male vs. female | 12.993 [8.229;17.755] | <0.001 |
| Cardiovascular diseases | Yes vs. no | –2.398 [–7.578;2.781] | 0.368 |
| Diabetes | Yes vs. no | –7.336 [–14.48;–0.193] | 0.046 |
| **Role limitations due to physical health** | |  |  |  |
| Time effect (months) |  | 2.886 [2.102;3.676] | <0.001 | 0.298 |
| Group | OSA vs. COPD | 5.120 [–2.018;12.25] | 0.163 |
|  | OS vs. COPD | 0.016 [–7.385;7.417] | 0.997 |
| Age |  | –0.029 [–0.341;0.283] | 0.855 |
| Sex | Male vs. female | 0.966 [–4.806;6.725] | 0.745 |
| Cardiovascular diseases | Yes vs. no | –1.495 [–7.733;4.745] | 0.641 |
| Diabetes | Yes vs. no | –0.257 [–8.795;8.280] | 0.953 |
| **Body pain** |  |  |  |  |
| Time effect (months) |  | 1.433 [1.009;1.859] | <0.001 | 0.199 |
| Group | OSA vs. COPD | –0.719 [–5.385;3.943] | 0.764 |
|  | OS vs. COPD | –4.296 [–9.147;0.551] | 0.085 |
| Age |  | –0.016 [–0.22;0.187] | 0.876 |
| Sex | Male vs. female | 7.603 [3.829;11.372] | <0.001 |
| Cardiovascular diseases | Yes vs. no | –2.584 [–6.674;1.505] | 0.219 |
| Diabetes | Yes vs. no | –4.365 [–9.972;1.246] | 0.131 |
| **General health** |  |  |  |  |
| Time effect (months) |  | 0.446 [0.17;0.723] | 0.002 | <0.001 |
| Group | OSA vs. COPD | 10.362 [5.878;14.848] | <0.001 |
|  | OS vs. COPD | –3.058 [–7.735;1.620] | 0.204 |
| Age |  | 0.269 [0.074;0.463] | 0.007 |
| Sex | Male vs. female | 4.979 [1.343;8.611] | 0.008 |
| Cardiovascular diseases | Yes vs. no | –3.012 [–6.959;0.937] | 0.138 |
| Diabetes | Yes vs. no | –4.694 [–10.132;0.744] | 0.094 |

CI, confidence interval; COPD, chronic obstructive pulmonary disease; OS, overlap syndrome; OSA, obstructive sleep apnea.

**TABLE S7** Factors affecting the change in Short Form-36 mental component subscale scores over time for the whole population

| **Variables** | **Items** | **β coefficient [95% CI]** | **p-value** | **Overall p-value** |
| --- | --- | --- | --- | --- |
| **Role limitations due to mental health** | |  |  |  |
| Time effect (months) |  | 1.767 [0.998;2.537] | <0.001 | 0.130 |
| Group | OSA vs. COPD | 5.885 [–1.476;13.249] | 0.121 |
| OS vs. COPD | –1.837 [–9.467;5.804] | 0.640 |
| Age |  | 0.262 [–0.06;0.583] | 0.114 |
| Sex | Male vs. female | 7.766 [1.811;13.706] | 0.011 |
| Cardiovascular diseases | Yes vs. no | 1.963 [–4.47;8.398] | 0.553 |
| Diabetes | Yes vs. no | –6.164 [–14.966;2.633] | 0.174 |
| **Vitality** | |  |  |  |
| Time effect (months) |  | 1.363 [1.028;1.701] | <0.001 | 0.324 |
| Group | OSA vs. COPD | 1.0,13 [–3.269;5.296] | 0.645 |
|  | OS vs. COPD | –2.475 [–6.933;1.984] | 0.280 |
| Age |  | 0.146 [–0.04;0.332] | 0.128 |
| Sex | Male vs. female | 4.548 [1.081;8.013] | 0.011 |
| Cardiovascular diseases | Yes vs. no | –1.569 [–5.333;2.191] | 0.417 |
| Diabetes | Yes vs. no | –2.107 [–7.276;3.061] | 0.428 |
| **Mental health** |  |  |  |  |
| Time effect (months) |  | 0.767 [0.458;1.076] | <0.001 | 0.091 |
| Group | OSA vs. COPD | –0.365 [–4.834;4.103] | 0.874 |
|  | OS vs. COPD | –4.866 [–9.522;–0.208] | 0.043 |
| Age |  | 0.257 [0.063;0.451] | 0.010 |
| Sex | Male vs. female | 9.776 [6.156;13.393] | <0.001 |
| Cardiovascular diseases | Yes vs. no | –1.004 [–4.936;2.925] | 0.619 |
| Diabetes | Yes vs. no | –2.338 [–7.746;3.069] | 0.400 |
| **Social functioning** |  |  |  |  |
| Time effect (months) |  | 0.867 [0.435;1.302] | <0.001 | 0.084 |
| Group | OSA vs. COPD | 2.276[–2.334;6.884] | 0.337 |
|  | OS vs. COPD | –3.394 [–8.182;1.395] | 0.168 |
| Age |  | 0.209 [0.009;0.410] | 0.043 |
| Sex | Male vs. female | 4.876 [1.149;8.601] | 0.011 |
| Cardiovascular diseases | Yes vs. no | –1.199 [–5.24;2.838] | 0.564 |
| Diabetes | Yes vs. no | –6.285 [–11.823;–0.75] | 0.028 |

CI, confidence interval; COPD, chronic obstructive pulmonary disease; OS, overlap syndrome; OSA, obstructive sleep apnea.

**FIGURE S1** Flow diagram of the study. COPD, chronic obstructive pulmonary disease; OS, overlap syndrome; OSA, obstructive sleep apnea.


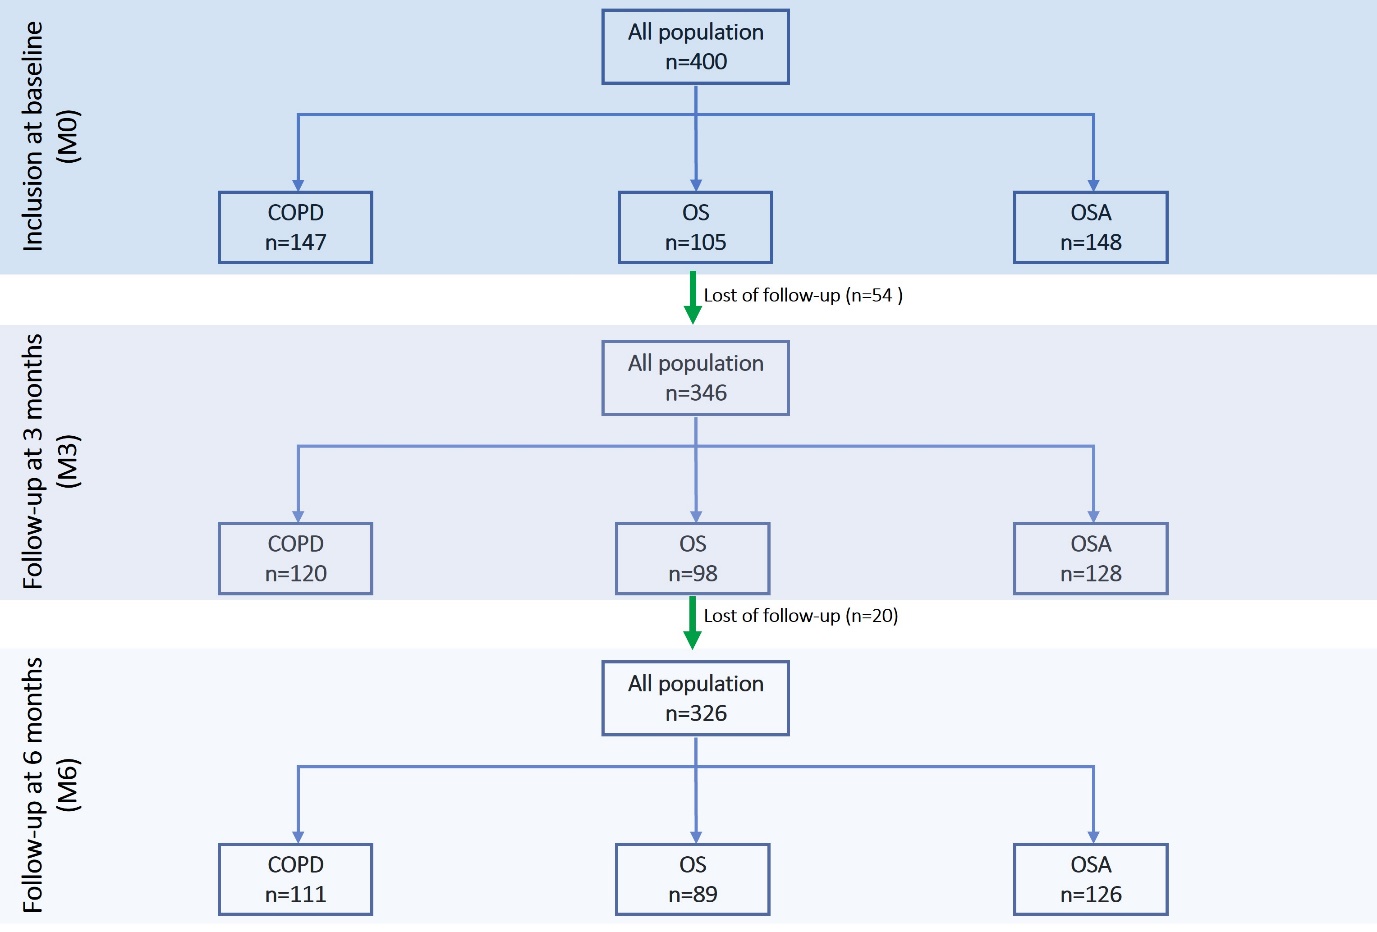


**FIGURE S2** Summary of the determinants influencing the evolution of Short Form-36 domains in the overall population. COPD, chronic obstructive pulmonary disease; OS, overlap syndrome; OSA, obstructive sleep apnea.


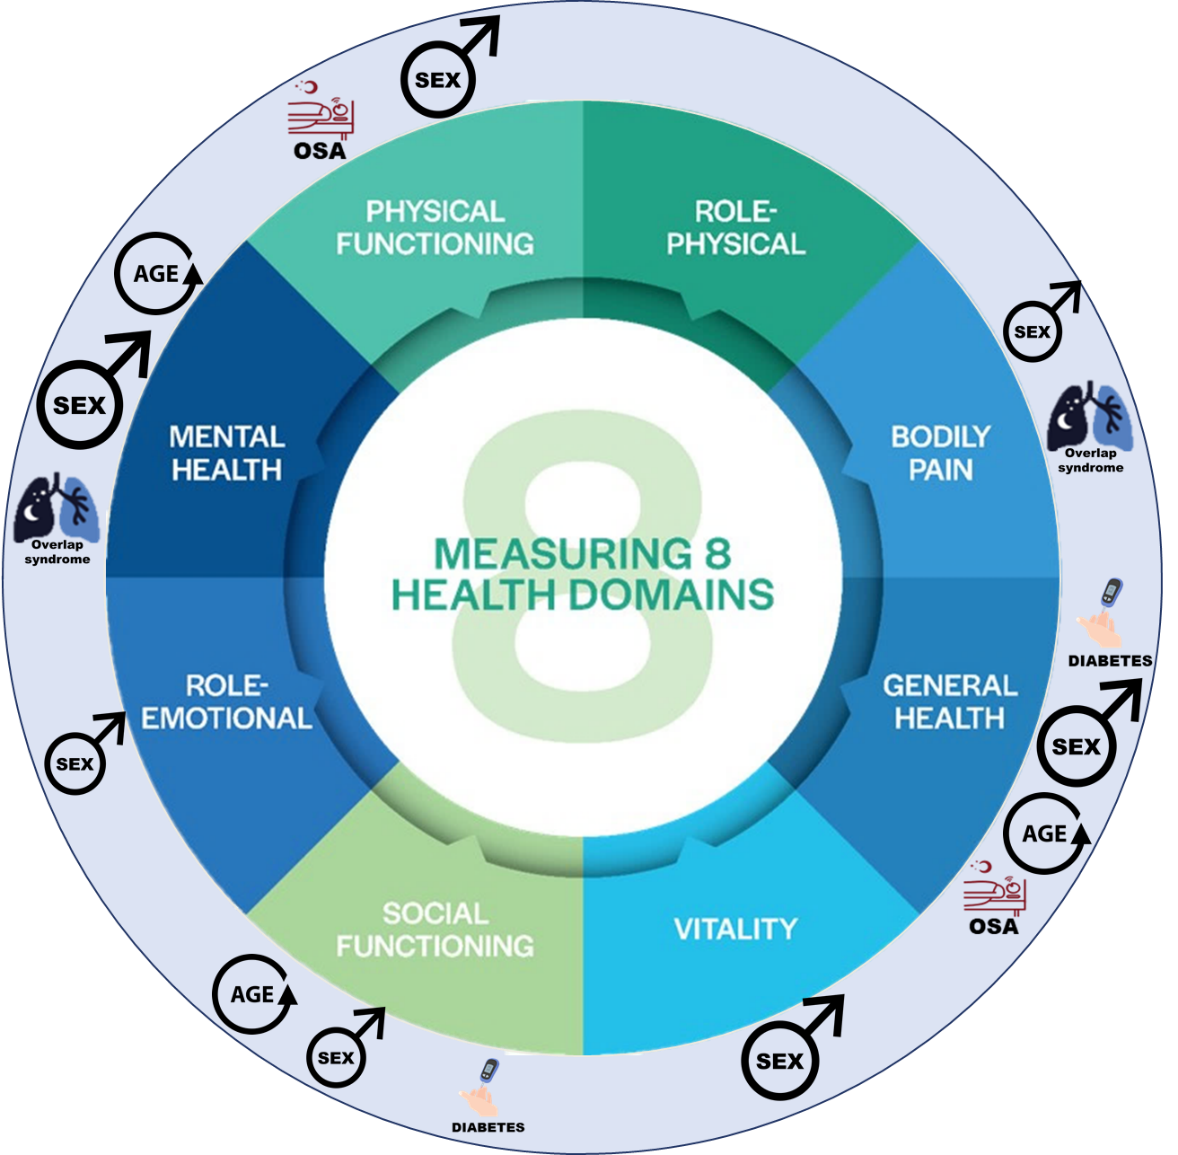


**FIGURE S3** Heatmaps of β-coefficient values relating to predictive factors for the change in the Short Form-36 (SF-36) physical (PCS; blue) and mental (MCS; red) component scores. BP, body pain; COPD, chronic obstructive pulmonary disease; GH, general health; HC, health change; MH, mental health; OS, overlap syndrome; OSA, obstructive sleep apnea; PF, physical functioning; RE, role limitations due to emotional problems; RP, role limitations due to physical health; SF, social functioning; VI, vitality. A β-coefficient value <0 indicates a decrease in SF-36 score (i.e. worse health-related quality of life) and a β-coefficient value >0 indicates an increase in SF-36 score (i.e. better health-related quality of life) over time. *statistically significant at p<0.05.
